# Supplementary material for: Multi-Objective PSO with Variable Number of Dimensions for Space Robot Path Optimization
Source: MDPI journal article supplement (doi:10.3390/a16060307), 2023-06-20
Supplement: s1 [file s1]

# Supplementary Materials: Definition of Multi-objective Benchmark Problems with Variable Number of Dimensions

Petr Kadlec 

## 1. Dimension of Pareto Front Members

The dimension of a solution  $u$  residing on the Pareto front can be selected based on [1]:

$$D^{(\text{opt})}(u) = D_i^{(\text{opt})}. \quad (\text{S1})$$

where the optimal dimension for the Pareto front member is selected from the list of optimal dimensions  $\{D_{\min}^{\text{opt}}, \dots, D_{\max}^{\text{opt}}\}$  having in total  $N_{\text{opt}}$  members. The index of the  $i$ -th member is selected according to:

$$i = 1 + \left\lfloor \left(1 - \frac{\theta(u)}{\theta_M}\right) (N_{\text{opt}} - 1) \right\rfloor \quad (\text{S2})$$

for  $\theta(u) \leq \theta_M$ , and

$$i = 1 + \left\lfloor \left(\frac{\theta(u)}{\theta_M}\right) (N_{\text{opt}} - 1) \right\rfloor \quad (\text{S3})$$

for  $\theta(u) > \theta_M$ . The symbol  $\theta_M$  stands for the maximal angle (set to value  $\pi/4$  in this study). The angle  $\theta(u)$  reads:

$$\theta(u) = \arccos\left(\frac{f_2}{\sqrt{f_1^2 + f_2^2}}\right) \quad (\text{S4})$$

for the two-objective problems, and

$$\theta(u) = \arccos\left(\max\left(\frac{f_1}{\sqrt{f_1^2 + f_2^2 + f_3^2}}, \frac{f_2}{\sqrt{f_1^2 + f_2^2 + f_3^2}}, \frac{f_3}{\sqrt{f_1^2 + f_2^2 + f_3^2}}\right)\right) \quad (\text{S5})$$

for the three-objective problems. In (S.4), and (S.5),  $f_i$ ,  $i = 1, 2, 3$  denote the values of individual objective functions for the solution  $u$ . By (S.2), and (S.3), the Pareto front is divided into two parts. Dimensions of the  $\mathcal{PF}$ s gradually decrease in the first part, while they start to gradually increase once the angle  $\theta(u)$  overcomes the limit  $\theta_M$ . The selection of optimal dimensions for individual members of Pareto front is visualized in Figure S.1.

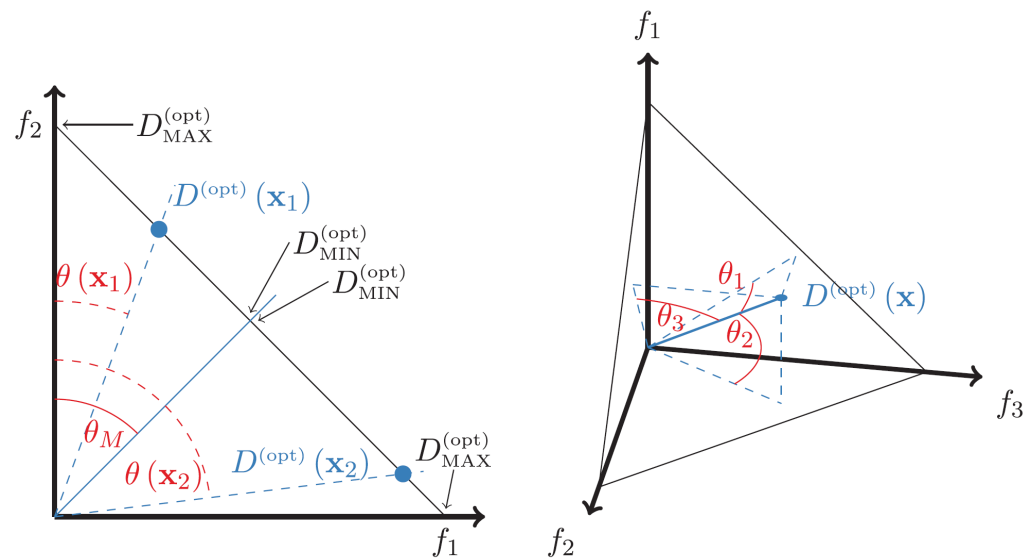

**Figure S1.** Selection of optimal dimension for two-objective and three-objective Pareto front members [3].

## 2. Benchmark Problems Definition

This study considers following benchmark problems defined in [2,3]. All the benchmark problems are scalable, so that their true Pareto front can be made from decision space vectors  $u$  with arbitrary dimensions. The problems in the following subsections are defined by limits for individual variables, a set of two, or three objective functions, and a list of feasible dimensions. The problems are defined based on well-known benchmark families DTLZ [4], ZDT [5], LI [1], and LZ [6]. In this study, the list of optimal dimensions is set as  $D^{(opt)}$ .

### 2.1. VNDMODTLZ1

Based on DTLZ family of benchmark problems [4].

Limits:

$$\begin{aligned} u_{i,\min} &= 0, \\ u_{i,\max} &= 1.0, \\ i &= 1, 2, \dots, N_{\max}. \end{aligned} \quad (S6)$$

Objective functions:

$$\begin{aligned} f_1(u) &= [1 + h(u_{M:N_D})] 0.5u_1 \cdot u_2 + P, \\ f_2(u) &= [1 + h(u_{M:N_D})] 0.5u_1(1 - u_2) + P, \\ f_3(u) &= [1 + h(u_{M:N_D})] 0.5(1 - u_1) + P, \\ h(z) &= 100 \left\{ k + \left[ \sum_{i=1}^k (z_i - 0.5)^2 - 5 \cos(20\pi(z_i - 0.5)) \right] \right\}, \\ P &= 0.50(N_D - D_{opt})^2. \end{aligned} \quad (S7)$$

Here,  $M$  stands for the number of objectives, and  $k = N_D - M + 1$ .

### 2.2. VNDMODTLZ2

Based on DTLZ family of benchmark problems [4].

Limits:

$$\begin{aligned} u_{i,\min} &= 0, \\ u_{i,\max} &= 1.0, \\ i &= 1, 2, \dots, N_{\max}. \end{aligned} \quad (S8)$$

Objective functions:

$$\begin{aligned} f_1(\mathbf{u}) &= [1 + h(u_{M:N_D})] \cos(u_1 \pi / 2) \cos(u_2 \pi / 2) + P, \\ f_2(\mathbf{u}) &= [1 + h(u_{M:N_D})] \cos(u_1 \pi / 2) \sin(u_2 \pi / 2) + P, \\ f_3(\mathbf{u}) &= [1 + h(u_{M:N_D})] \sin(u_1 \pi / 2) + P, \\ h(\mathbf{z}) &= \sum_{i=1}^k (z_i - 0.5)^2, \\ P &= 0.05(N_D - D_{opt})^2. \end{aligned} \quad (S9)$$

Here,  $M$  stands for the number of objectives, and  $k = N_D - M + 1$ .

### 2.3. VNDMODTLZ3

Based on DTLZ family of benchmark problems [4].

Limits:

$$\begin{aligned} u_{i,\min} &= 0, \\ u_{i,\max} &= 1.0, \\ i &= 1, 2, \dots, N_{\max}. \end{aligned} \quad (S10)$$

Objective functions:

$$\begin{aligned} f_1(\mathbf{u}) &= [1 + h(u_{M:N_D})] \cos(u_1 \pi / 2) \cos(u_2 \pi / 2) + P, \\ f_2(\mathbf{u}) &= [1 + h(u_{M:N_D})] \cos(u_1 \pi / 2) \sin(u_2 \pi / 2) + P, \\ f_3(\mathbf{u}) &= [1 + h(u_{M:N_D})] \sin(u_1 \pi / 2) + P, \\ h(\mathbf{z}) &= 100 \left\{ k + \left[ \sum_{i=1}^k (z_i - 0.5)^2 - 5 \cos(20\pi(z_i - 0.5)) \right] \right\}, \\ P &= 0.80(N_D - D_{opt})^2. \end{aligned} \quad (S11)$$

Here,  $M$  stands for the number of objectives, and  $k = N_D - M + 1$ .

### 2.4. VNDMODTLZ4

Based on DTLZ family of benchmark problems [4].

Limits:

$$\begin{aligned} u_{i,\min} &= 0, \\ u_{i,\max} &= 1.0, \\ i &= 1, 2, \dots, N_{\max}. \end{aligned} \quad (S12)$$

Objective functions:

$$\begin{aligned} f_1(\mathbf{u}) &= [1 + h(u_{M:N_D})] \cos(u_1^\alpha \pi/2) \cos(u_2^\alpha \pi/2) + P, \\ f_2(\mathbf{u}) &= [1 + h(u_{M:N_D})] \cos(u_1^\alpha \pi/2) \sin(u_2^\alpha \pi/2) + P, \\ f_3(\mathbf{u}) &= [1 + h(u_{M:N_D})] \sin(u_1^\alpha \pi/2) + P, \\ h(\mathbf{z}) &= \sum_{i=1}^k (z_i - 0.5)^2, \\ P &= 0.05(N_D - D_{opt})^2, \\ \alpha &= 100. \end{aligned} \tag{S13}$$

Here,  $M$  stands for the number of objectives, and  $k = N_D - M + 1$ .

## 2.5. VNDMODTLZ5

Based on DTLZ family of benchmark problems [4].

Limits:

$$\begin{aligned} u_{i,\min} &= 0, \\ u_{i,\max} &= 1.0, \\ i &= 1, 2, \dots, N_{\max}. \end{aligned} \tag{S14}$$

Objective functions:

$$\begin{aligned} f_1(\mathbf{u}) &= [1 + h(u_{M:N_D})] \cos(\theta_1 \pi/2) \cos(\theta_2 \pi/2) + P, \\ f_2(\mathbf{u}) &= [1 + h(u_{M:N_D})] \cos(\theta_1 \pi/2) \sin(\theta_2 \pi/2) + P, \\ f_3(\mathbf{u}) &= [1 + h(u_{M:N_D})] \sin(\theta_1 \pi/2) + P, \\ h(\mathbf{z}) &= \sum_{i=1}^k (z_i - 0.5)^2, \\ \theta_1 &= u_i, \\ \theta_i &= \frac{1 + 2hu_i}{2(1 + h)}, \\ i &= 2, 3, \dots, M - 1, \\ P &= 0.05(N_D - D_{opt})^2. \end{aligned} \tag{S15}$$

Here,  $M$  stands for the number of objectives, and  $k = N_D - M + 1$ .

## 2.6. VNDMODTLZ6

Based on DTLZ family of benchmark problems [4].

Limits:

$$\begin{aligned} u_{i,\min} &= 0, \\ u_{i,\max} &= 1.0, \\ i &= 1, 2, \dots, N_{\max}. \end{aligned} \tag{S16}$$

Objective functions:

$$\begin{aligned}
 f_1(\mathbf{u}) &= [1 + h(u_{M:N_D})] \cos(\theta_1 \pi/2) \cos(\theta_2 \pi/2) + P, \\
 f_2(\mathbf{u}) &= [1 + h(u_{M:N_D})] \cos(\theta_1 \pi/2) \sin(\theta_2 \pi/2) + P, \\
 f_3(\mathbf{u}) &= [1 + h(u_{M:N_D})] \sin(\theta_1 \pi/2) + P, \\
 h(\mathbf{z}) &= \sum_{i=1}^k z_i^{0.1}, \\
 \theta_1 &= u_1, \\
 \theta_i &= \frac{1 + 2hu_i}{2(1 + h)}, \\
 i &= 2, 3, \dots, M - 1, \\
 P &= 0.08(N_D - D_{opt})^2.
 \end{aligned} \tag{S17}$$

Here,  $M$  stands for the number of objectives, and  $k = N_D - M + 1$ .

## 2.7. VNDMODTLZ7

Based on DTLZ family of benchmark problems [4].

Limits:

$$\begin{aligned}
 u_{i,\min} &= 0, \\
 u_{i,\max} &= 1.0, \\
 i &= 1, 2, \dots, N_{\max}.
 \end{aligned} \tag{S18}$$

Objective functions:

$$\begin{aligned}
 f_1(\mathbf{u}) &= u_1 + P, \\
 f_2(\mathbf{u}) &= u_2 + P, \\
 f_3(\mathbf{u}) &= [1 + h(u_{M:N_D})] \left\{ M - \sum_{i=1}^{M-1} \left[ \frac{f_i}{1 + h(u_{M:N_D})} (1 + \sin(3\pi f_i)) \right] \right\} + P, \\
 h(\mathbf{z}) &= 1 + \frac{9}{k} \sum_{i=1}^k z_i, \\
 P &= 0.30(N_D - D_{opt})^2.
 \end{aligned} \tag{S19}$$

Here,  $M$  stands for the number of objectives, and  $k = N_D - M + 1$ .

## 2.8. VNDMOLI1

Based on LI family of benchmark problems [1].

Limits:

$$\begin{aligned}
 u_{i,\min} &= 0, \\
 u_{i,\max} &= 1.0, \\
 i &= 1, 2, \dots, N_{\max}.
 \end{aligned} \tag{S20}$$

Objective functions:

$$\begin{aligned}
 f_1(\mathbf{u}) &= u_1 + h(u_{2:N_D}), \\
 f_2(\mathbf{u}) &= 1 - u_1 + h(u_{2:N_D}) + P, \\
 h(\mathbf{z}) &= \sum_{i=1}^k \left[ z_i - \sin\left(\frac{D_{opt}}{2N_D} \pi\right) \right]^2, \\
 P &= 0.01(N_D - D_{opt})^2.
 \end{aligned} \tag{S21}$$

Here,  $k = N_D - 1$ .

## 2.9. VNDMOLZ1

Based on LZ family of benchmark problems [6].

Limits:

$$\begin{aligned} u_{i,\min} &= 0, \\ u_{i,\max} &= 1.0, \\ i &= 1, 2, \dots, N_{\max}. \end{aligned} \quad (S22)$$

Objective functions:

$$\begin{aligned} f_1(\mathbf{u}) &= u_1 + \frac{2}{|J_1|} \sum_{j \in J_1} [u_j - h(j, u_1)]^2, \\ f_2(\mathbf{u}) &= 1 - \sqrt{u_1} + \frac{2}{|J_2|} \sum_{j \in J_2} [u_j - h(j, u_1)]^2 + P, \\ h(j) &= u_1^{0.5 \left(1 + \frac{3j-6}{N_D-2}\right)}, \\ J_1 &= 3, 5, \dots, N_D, \\ J_2 &= 2, 4, \dots, N_D, \\ P &= 0.05(N_D - D_{opt})^2. \end{aligned} \quad (S23)$$

## 2.10. VNDMOLZ2

Based on LZ family of benchmark problems [6].

Limits:

$$\begin{aligned} u_{1,\min} &= 0, \\ u_{1,\max} &= 1.0, \\ u_{i,\min} &= -1.0, \\ u_{i,\max} &= 1.0, \\ i &= 2, 3, \dots, N_{\max}. \end{aligned} \quad (S24)$$

Objective functions:

$$\begin{aligned} f_1(\mathbf{u}) &= u_1 + \frac{2}{|J_1|} \sum_{j \in J_1} [u_j - h(j, u_1)]^2, \\ f_2(\mathbf{u}) &= 1 - \sqrt{u_1} + \frac{2}{|J_2|} \sum_{j \in J_2} [u_j - h(j, u_1)]^2 + P, \\ h(j) &= \sin\left(6\pi u_1 + \frac{j\pi}{N_D}\right), \\ j &= 1, 2, \dots, N_D, \\ J_1 &= 3, 5, \dots, N_D, \\ J_2 &= 2, 4, \dots, N_D, \\ P &= 0.06(N_D - D_{opt})^2. \end{aligned} \quad (S25)$$

## 2.11. VNDMOLZ3

Based on LZ family of benchmark problems [6].

Limits:

$$\begin{aligned} u_{1,\min} &= 0, \\ u_{1,\max} &= 1.0, \\ u_{i,\min} &= -1.0, \\ u_{i,\max} &= 1.0, \\ i &= 2, 3, \dots, N_{\max}. \end{aligned} \quad (\text{S26})$$

Objective functions:

$$\begin{aligned} f_1(\mathbf{u}) &= u_1 + \frac{2}{|J_1|} \sum_{j \in J_1} [u_j - h_1(j, u_1)]^2, \\ f_2(\mathbf{u}) &= 1 - \sqrt{u_1} + \frac{2}{|J_2|} \sum_{j \in J_2} [u_j - h_2(j, u_1)]^2 + P, \\ h_1(j) &= 0.8u_1 \cos\left(6\pi u_1 + \frac{j\pi}{N_D}\right), \\ h_2(j) &= 0.8u_1 \sin\left(6\pi u_1 + \frac{j\pi}{N_D}\right), \\ j &= 1, 2, \dots, N_D, \\ J_1 &= 3, 5, \dots, N_D, \\ J_2 &= 2, 4, \dots, N_D, \\ P &= 0.06(N_D - D_{opt})^2. \end{aligned} \quad (\text{S27})$$

## 2.12. VNDMOLZ4

Based on LZ family of benchmark problems [6].

Limits:

$$\begin{aligned} u_{1,\min} &= 0, \\ u_{1,\max} &= 1.0, \\ u_{i,\min} &= -1.0, \\ u_{i,\max} &= 1.0, \\ i &= 2, 3, \dots, N_{\max}. \end{aligned} \quad (\text{S28})$$

Objective functions:

$$\begin{aligned} f_1(\mathbf{u}) &= u_1 + \frac{2}{|J_1|} \sum_{j \in J_1} [u_j - h_1(j, u_1)]^2, \\ f_2(\mathbf{u}) &= 1 - \sqrt{u_1} + \frac{2}{|J_2|} \sum_{j \in J_2} [u_j - h_2(j, u_1)]^2 + P, \\ h_1(j) &= 0.8u_1 \cos\left(\frac{6\pi u_1 + \frac{j\pi}{N_D}}{3}\right), \\ h_2(j) &= 0.8u_1 \sin\left(6\pi u_1 + \frac{j\pi}{N_D}\right), \\ j &= 1, 2, \dots, N_D, \\ J_1 &= 3, 5, \dots, N_D, \\ J_2 &= 2, 4, \dots, N_D, \\ P &= 0.05(N_D - D_{opt})^2. \end{aligned} \quad (\text{S29})$$

### 2.13. VNDMOLZ5

Based on LZ family of benchmark problems [6].

Limits:

$$\begin{aligned} u_{1,\min} &= 0, \\ u_{1,\max} &= 1.0, \\ u_{i,\min} &= -1.0, \\ u_{i,\max} &= 1.0, \\ i &= 2, 3, \dots, N_{\max}. \end{aligned} \quad (\text{S30})$$

Objective functions:

$$\begin{aligned} f_1(\mathbf{u}) &= u_1 + \frac{2}{|J_1|} \sum_{j \in J_1} [u_j - h_1(j, u_1)]^2, \\ f_2(\mathbf{u}) &= 1 - \sqrt{u_1} + \frac{2}{|J_2|} \sum_{j \in J_2} [u_j - h_2(j, u_1)]^2 + P, \\ h_1(j) &= \left[ 0.3u_1^2 \cos\left(24\pi u_1 + \frac{4j\pi}{N_D}\right) + 0.6u_1 \right] \cos\left(6\pi u_1 + \frac{j\pi}{N_D}\right), \\ h_2(j) &= \left[ 0.3u_1^2 \cos\left(24\pi u_1 + \frac{4j\pi}{N_D}\right) + 0.6u_1 \right] \sin\left(6\pi u_1 + \frac{j\pi}{N_D}\right), \\ j &= 1, 2, \dots, N_D, \\ J_1 &= 3, 5, \dots, N_D, \\ J_2 &= 2, 4, \dots, N_D, \\ P &= 0.05(N_D - D_{\text{opt}})^2. \end{aligned} \quad (\text{S31})$$

### 2.14. VNDMOLZ6

Based on LZ family of benchmark problems [6].

Limits:

$$\begin{aligned} u_{i,\min} &= 0, \\ u_{i,\max} &= 1.0, \\ i &= 1, 2, \\ u_{j,\min} &= -2.0, \\ u_{j,\max} &= 2.0, \\ j &= 3, 4, \dots, N_{\max}. \end{aligned} \quad (\text{S32})$$



Objective functions:

$$\begin{aligned}
 f_1(\mathbf{u}) &= \cos(0.5u_1\pi) \cos(0.5u_2\pi) + \frac{2}{|J_1|} \sum_{j \in J_1} [u_j - h(j, u_1, u_2)]^2 + P, \\
 f_2(\mathbf{u}) &= \cos(0.5u_1\pi) \sin(0.5u_2\pi) + \frac{2}{|J_2|} \sum_{j \in J_2} [u_j - h(j, u_1, u_2)]^2 + P, \\
 f_3(\mathbf{u}) &= \sin(0.5u_1\pi) + \frac{2}{|J_3|} \sum_{j \in J_3} [u_j - h(j, u_1, u_2)]^2 + P, \\
 h(j) &= 2u_2 \sin\left(2\pi u_1 + \frac{j\pi}{N_D}\right), \\
 j &= 1, 2, \dots, N_D, \\
 J_1 &= 4, 7, \dots, N_D, \\
 J_2 &= 5, 8, \dots, N_D, \\
 J_3 &= 3, 6, \dots, N_D, \\
 P &= 0.12(N_D - D_{opt})^2.
 \end{aligned} \tag{S33}$$

#### 2.15. VNDMOLZ7

Based on LZ family of benchmark problems [6].

Limits:

$$\begin{aligned}
 u_{i,\min} &= 0, \\
 u_{i,\max} &= 1.0, \\
 i &= 1, 2, \dots, N_{\max}.
 \end{aligned} \tag{S34}$$

Objective functions:

$$\begin{aligned}
 f_1(\mathbf{u}) &= u_1 + \frac{2}{|J_1|} \sum_{j \in J_1} [4y_j^2 - \cos(8y_j\pi) + 1], \\
 f_2(\mathbf{u}) &= 1 - \sqrt{u_1} + \frac{2}{|J_2|} \sum_{j \in J_2} [4y_j^2 - \cos(8y_j\pi) + 1] + P, \\
 y_j &= u_j - h(j), \\
 h(j) &= u_1^{0.5\left(1 + \frac{3j-6}{N_D-2}\right)}, \\
 j &= 1, 2, \dots, N_D, \\
 J_1 &= 3, 5, \dots, N_D, \\
 J_2 &= 2, 4, \dots, N_D, \\
 P &= 0.10(N_D - D_{opt})^2.
 \end{aligned} \tag{S35}$$

#### 2.16. VNDMOLZ8

Based on LZ family of benchmark problems [6].

Limits:

$$\begin{aligned}
 u_{i,\min} &= 0, \\
 u_{i,\max} &= 1.0, \\
 i &= 1, 2, \dots, N_{\max}.
 \end{aligned} \tag{S36}$$

Objective functions:

$$\begin{aligned}
 f_1(\mathbf{u}) &= u_1 + \frac{2}{|J_1|} \left[ 4 \sum_{j \in J_1} y_j^2 - 2 \prod_{j \in J_1} \cos \left( \frac{20y_j\pi}{\sqrt{j}} \right) + 2 \right], \\
 f_2(\mathbf{u}) &= 1 - \sqrt{u_1} + \frac{2}{|J_2|} \left[ 4 \sum_{j \in J_2} y_j^2 - 2 \prod_{j \in J_2} \cos \left( \frac{20y_j\pi}{\sqrt{j}} \right) + 2 \right] + P, \\
 y_j &= u_j - h(j), \\
 h(j) &= u_1^{0.5 \left( 1 + \frac{3j-6}{N_D-2} \right)}, \\
 j &= 1, 2, \dots, N_D, \\
 J_1 &= 3, 5, \dots, N_D, \\
 J_2 &= 2, 4, \dots, N_D, \\
 P &= 0.35(N_D - D_{opt})^2.
 \end{aligned} \tag{S37}$$

### 2.17. VNDMOLZ9

Based on LZ family of benchmark problems [6].

Limits:

$$\begin{aligned}
 u_{1,\min} &= 0, \\
 u_{1,\max} &= 1.0, \\
 u_{i,\min} &= -1.0, \\
 u_{i,\max} &= 1.0, \\
 i &= 2, 3, \dots, N_{\max}.
 \end{aligned} \tag{S38}$$

Objective functions:

$$\begin{aligned}
 f_1(\mathbf{u}) &= u_1 + \frac{2}{|J_1|} \sum_{j \in J_1} [u_j - h(j, u_1)]^2, \\
 f_2(\mathbf{u}) &= 1 - u_1^2 + \frac{2}{|J_2|} \sum_{j \in J_2} [u_j - h(j, u_1)]^2 + P, \\
 h(j) &= \sin \left( 6\pi u_1 + \frac{j\pi}{N_D} \right), \\
 j &= 1, 2, \dots, N_D, \\
 J_1 &= 3, 5, \dots, N_D, \\
 J_2 &= 2, 4, \dots, N_D, \\
 P &= 0.06(N_D - D_{opt})^2.
 \end{aligned} \tag{S39}$$

### 2.18. VNDMOZDT1

Based on ZDT family of benchmark problems [5].

Limits:

$$\begin{aligned}
 u_{i,\min} &= 0, \\
 u_{i,\max} &= 1.0, \\
 i &= 1, 2, \dots, N_{\max}.
 \end{aligned} \tag{S40}$$

Objective functions:

$$\begin{aligned} f_1(\mathbf{u}) &= u_1, \\ f_2(\mathbf{u}) &= h(\mathbf{u}) \left[ 1 - \sqrt{\frac{u_1}{h(\mathbf{u})}} \right] + P, \\ h(\mathbf{u}) &= 1 + 9 \frac{\sum_{i=2}^{N_D} u_i}{N_D - 1}, \\ P &= 0.10(N_D - D_{opt})^2. \end{aligned} \tag{S41}$$

#### 2.19. VNDMOZDT2

Based on ZDT family of benchmark problems [5].

Limits:

$$\begin{aligned} u_{i,\min} &= 0, \\ u_{i,\max} &= 1.0, \\ i &= 1, 2, \dots, N_{\max}. \end{aligned} \tag{S42}$$

Objective functions:

$$\begin{aligned} f_1(\mathbf{u}) &= u_1, \\ f_2(\mathbf{u}) &= h(\mathbf{u}) \left[ 1 - \left( \frac{u_1}{h(\mathbf{u})} \right)^2 \right] + P, \\ h(\mathbf{u}) &= 1 + 9 \frac{\sum_{i=2}^{N_D} u_i}{N_D - 1}, \\ P &= 0.10(N_D - D_{opt})^2. \end{aligned} \tag{S43}$$

#### 2.20. VNDMOZDT3

Based on ZDT family of benchmark problems [5].

Limits:

$$\begin{aligned} u_{i,\min} &= 0, \\ u_{i,\max} &= 1.0, \\ i &= 1, 2, \dots, N_{\max}. \end{aligned} \tag{S44}$$

Objective functions:

$$\begin{aligned} f_1(\mathbf{u}) &= u_1, \\ f_2(\mathbf{u}) &= h(\mathbf{u}) \left[ 1 - \sqrt{\frac{u_1}{h(\mathbf{u})}} - \frac{u_1}{h(\mathbf{u})} \sin(10\pi u_1) \right] + P, \\ h(\mathbf{u}) &= 1 + 9 \frac{\sum_{i=2}^{N_D} u_i}{N_D - 1}, \\ P &= 0.10(N_D - D_{opt})^2. \end{aligned} \tag{S45}$$

#### 2.21. VNDMOZDT4

Based on ZDT family of benchmark problems [5].

Limits:

$$\begin{aligned} u_{1,\min} &= 0, \\ u_{1,\max} &= 1.0, \\ u_{i,\min} &= -5.0, \\ u_{i,\max} &= 5.0, \\ i &= 2, 3, \dots, N_{\max}. \end{aligned} \quad (\text{S46})$$

Objective functions:

$$\begin{aligned} f_1(\mathbf{u}) &= u_1, \\ f_2(\mathbf{u}) &= h(\mathbf{u}) \left[ 1 - \sqrt{\frac{u_1}{h(\mathbf{u})}} \right] + P, \\ h(\mathbf{u}) &= 1 + 10(N_D - 1) + \sum_{i=2}^{N_D} u_i^2 - 10 \cos(4\pi u_i), \\ P &= 0.20(N_D - D_{\text{opt}})^2. \end{aligned} \quad (\text{S47})$$

## 2.22. VNDMOZDT6

Based on ZDT family of benchmark problems [5].

Limits:

$$\begin{aligned} u_{i,\min} &= 0, \\ u_{i,\max} &= 1.0, \\ i &= 1, 2, \dots, N_{\max}. \end{aligned} \quad (\text{S48})$$

Objective functions:

$$\begin{aligned} f_1(\mathbf{u}) &= 1 - \exp(-4u_1) \sin^6(6\pi u_1), \\ f_2(\mathbf{u}) &= h(\mathbf{u}) \left[ 1 - \left( \frac{f_1(\mathbf{u})}{h(\mathbf{u})} \right)^2 \right] + P, \\ h(\mathbf{u}) &= 1 + 9 \left[ \frac{\sum_{i=2}^{N_D} u_i}{N_D - 1} \right]^{0.25}, \\ P &= 0.10(N_D - D_{\text{opt}})^2. \end{aligned} \quad (\text{S49})$$

## References

1. Li, H.; Deb, K. Challenges for evolutionary multiobjective optimization algorithms in solving variable-length problems. In Proceedings of the 2017 IEEE Congress on Evolutionary Computation (CEC). IEEE, 2017, pp. 2217–2224.
2. Marek, M.; Kadlec, P.; Čapek, M. FOPS: A new framework for the optimization with variable number of dimensions. *International Journal of RF and Microwave Computer-Aided Engineering* **2020**, *30*, e22335.
3. Marek, M.; Kadlec, P. Another evolution of generalized differential evolution: variable number of dimensions. *Engineering Optimization* **2022**, *54*, 61–80.
4. Deb, K.; Thiele, L.; Laumanns, M.; Zitzler, E. Scalable multi-objective optimization test problems. In Proceedings of the Proceedings of the 2002 Congress on Evolutionary Computation. CEC'02 (Cat. No. 02TH8600). IEEE, 2002, Vol. 1, pp. 825–830.
5. Deb, K.; Pratap, A.; Agarwal, S.; Meyarivan, T. A fast and elitist multiobjective genetic algorithm: NSGA-II. *IEEE transactions on evolutionary computation* **2002**, *6*, 182–197.
6. Li, H.; Zhang, Q. Multiobjective optimization problems with complicated Pareto sets, MOEA/D and NSGA-II. *IEEE transactions on evolutionary computation* **2008**, *13*, 284–302.

**Disclaimer/Publisher's Note:** The statements, opinions and data contained in all publications are solely those of the individual author(s) and contributor(s) and not of MDPI and/or the editor(s). MDPI and/or the editor(s) disclaim responsibility for any injury to people or property resulting from any ideas, methods, instructions or products referred to in the content.
